# Supplementary material for: Complete reversal of bilateral optic nerve infiltration from lymphoblastic leukemia using chemotherapy without adjuvant radiotherapy
Source: Springer Nature journal article supplement (doi:10.1186/s12886-021-02097-w), 2021-09-15
Supplement: MOESM1 [file 19665688]

---

**Mielogram evaluation**

---

96,4% of blasts; small size cells; hemodiluted and highly hypocellular

---

**Immunofluorescence markers**

---

Positive B-antigens: CD10, CD19, CD22, cytoplasmatic CD79a, cytoplasmatic IgM, CD38, HLA-DR, TdT, CD58

Negative for CD3, CD4, CD7, CD8, CD13, CD20, CD33, CD34, CD117 and mieloperoxidase

---

**Biomolecular study**

---

BCR-ABL p190 and p210: negative

PBX1: positive in the first phase

---

Bone marrow analysis upon diagnosis. CD: cluster of differentiation; TdT: terminal deoxynucleotidyl transferase; PBX1: PBX Homeobox 1
